# Supplementary material for: Studying Conformational Properties of Transmembrane Domain of KCNE3 in a Lipid Bilayer Membrane Using Molecular Dynamics Simulations
Source: MDPI journal article supplement (doi:10.3390/membranes14020045), 2024-02-04
Supplement: s1 [file s1]

## **Supporting Information for:**

# **Studying Conformational Properties of Transmembrane Domain of KCNE3 in a Lipid Bilayer Membrane Using Molecular Dynamics Simulations**

Anna Clara Miranda Moura<sup>1</sup>, Isaac K. Asare<sup>1</sup>, Mateo Fernandez Cruz<sup>1</sup>, Antonio Javier Franco Aguado<sup>1</sup>, Kaeleigh Dyan Tuck<sup>1</sup>, Conner C. Campbell<sup>1</sup>, Matthew W. Scheyer<sup>1</sup>, Ikponwmosa Obaseki<sup>2</sup>, Steve Alston<sup>1</sup>, Andrea N. Kravats<sup>2</sup>, Charles R. Sanders<sup>3</sup>, Gary A. Lorigan<sup>2</sup>, Indra D. Sahu<sup>1,2\*</sup>

<sup>1</sup> Natural Science Division, Campbellsville University, Campbellsville, KY 42718, USA;

<sup>2</sup> Department of Chemistry and Biochemistry, Miami University, Oxford, OH 45056, USA

<sup>3</sup> Department of Biochemistry and Center for Structural Biology, Vanderbilt University, Nashville, TN 37232, USA

\* Correspondence: idsahu@campbellsville.edu, Tel.: (270) 789-5597

### ***Contents:***

**Figure S1**

**Figure S2**

**Figure S3**

**Figure S4**

**Figure S5**

**Figure S6**

**Figure S7**

**Figure S8**

**Figure S9**

**Table S1**

**Table S2**

**Table S3**

**Table S4**

**Movie M1**

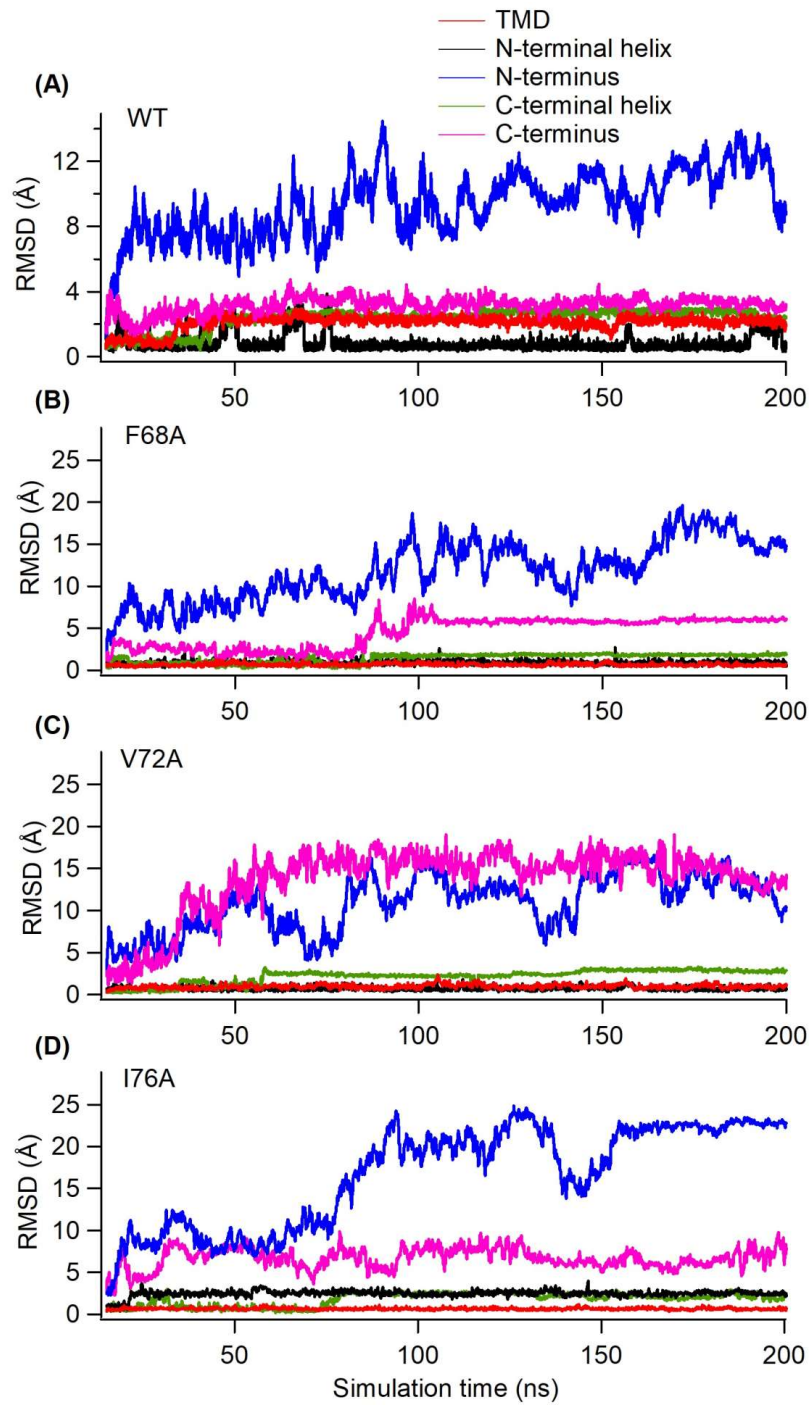

**FigureS1.** Backbone root mean square deviation (RMSD) as a function of simulation time for KCNE3 segments in simulations of WT KCNE3 (A), F68A KCNE3 (B), V72A KCNE3 (C), and I76A KCNE3 (D). The indicated segments were structurally aligned for the RMSD calculation of each unique region.

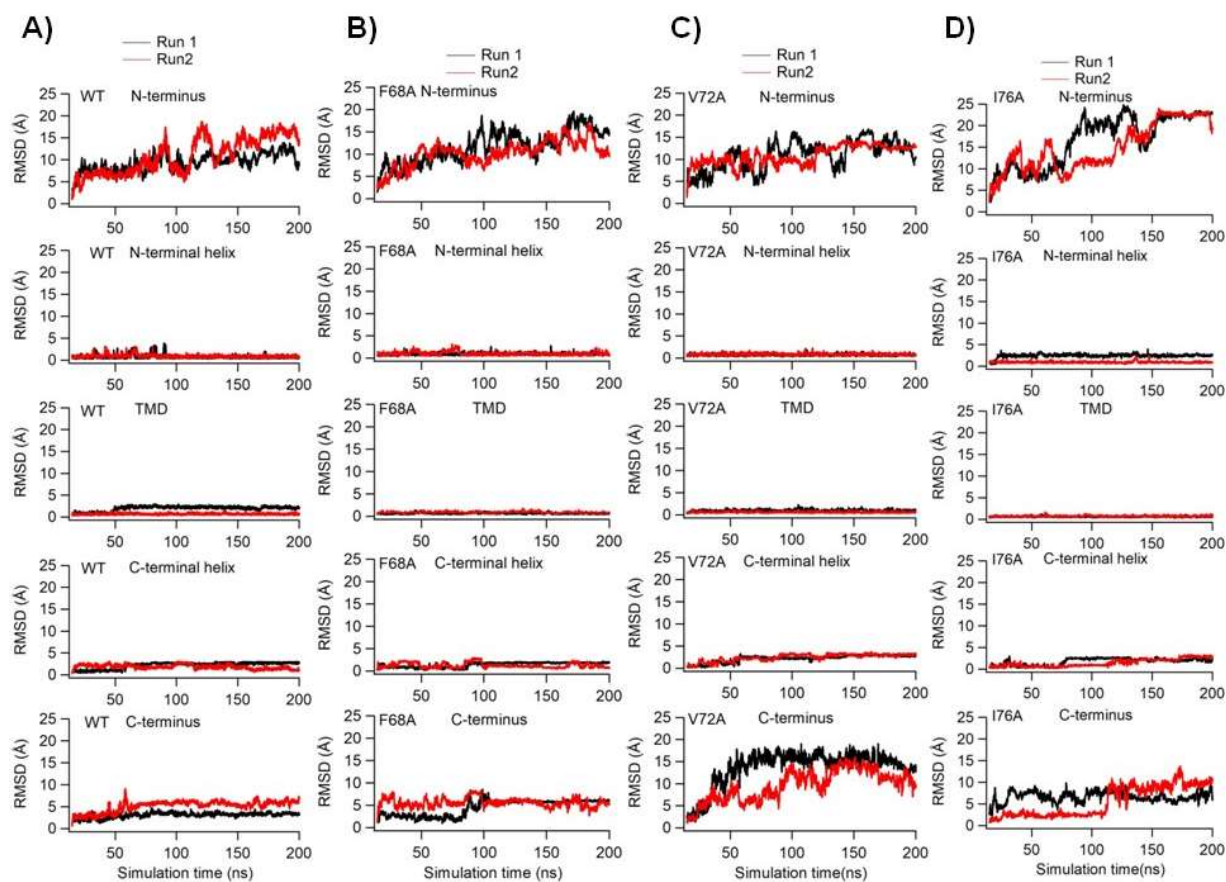

**Figure S2:** Comparison of the backbone root mean square deviations (RMSD) from one simulation (Run 1, black) and a duplicate simulation (Run 2, red) as a function of simulation time. The RMSD of different KCNE3 segments is measured for WT KCNE3 (A), F68A KCNE3 (B), V72A KCNE3 (C), and I76A KCNE3 (D).

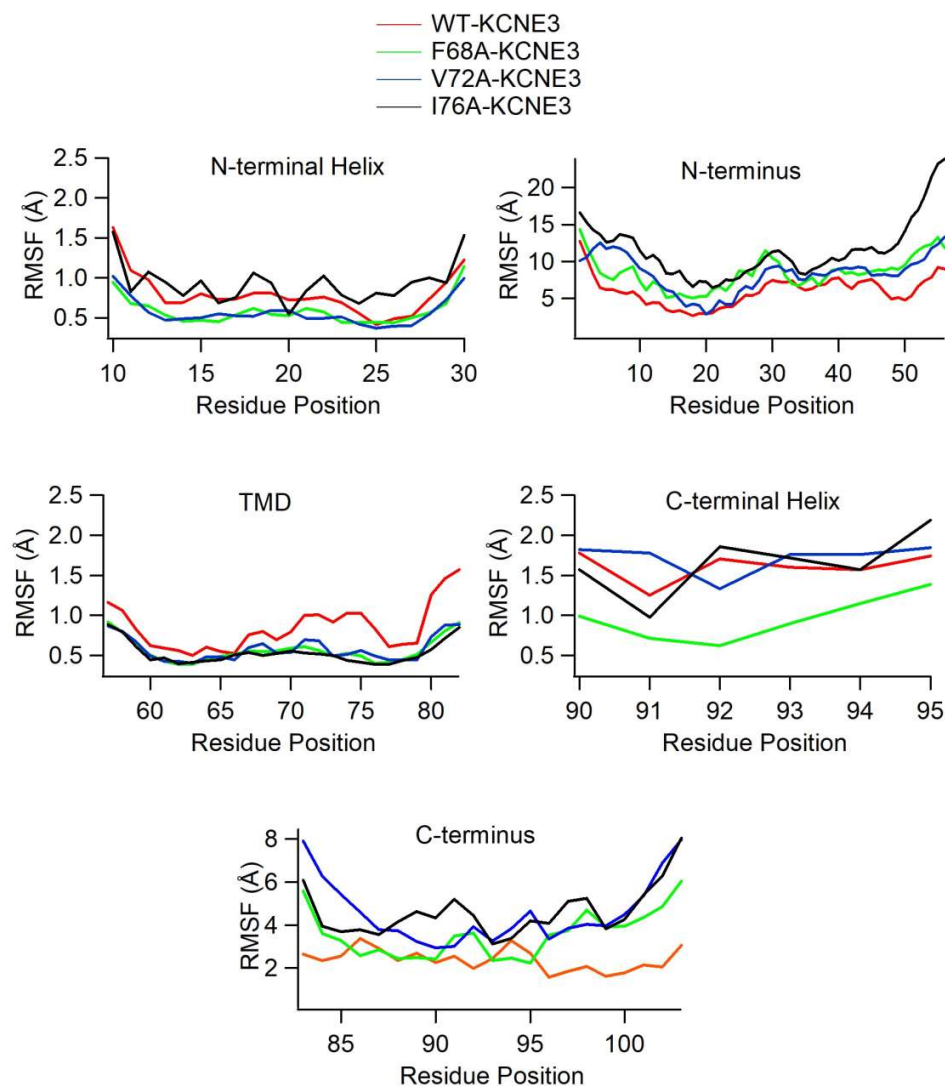

**Figure S3.** Plot of the root mean square fluctuation (RMSF) of KCNE3 as a function of simulation time for KCNE3 wild type (Red), KCNE3 F68A (green), KCNE3 V72A (Blue), and KCNE3 I76A (Black). The indicated segments were structurally aligned for the RMSF calculation of each unique region. Expanded Y-axis scales were used for N-terminus and C-terminus plots to cover the full range of RMSF values.

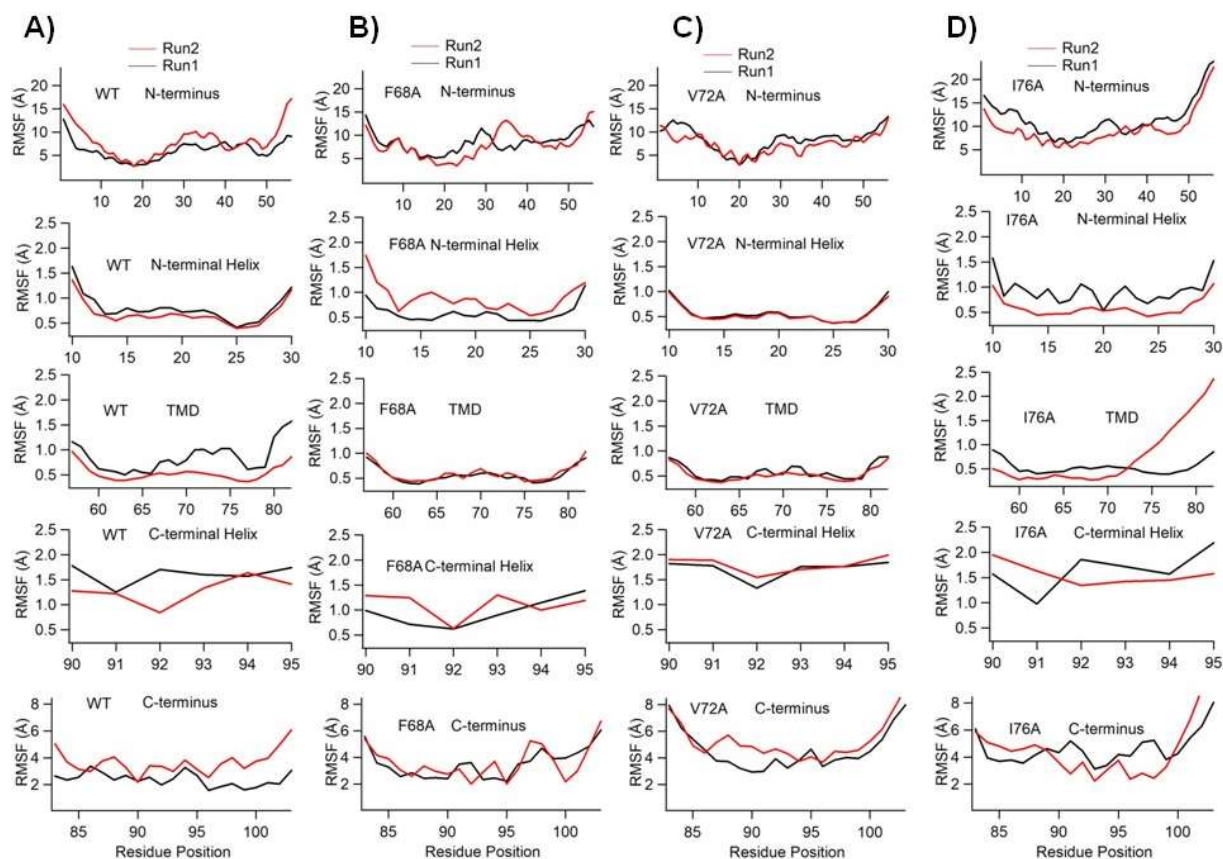

**Figure S4.** Comparison of the backbone root mean square fluctuations (RMSF) from simulation duplicates (Run 1; black and Run 2; red). RMSF of unique KCNE3 segments was calculated for WT-KCNE3 (A), F68A-KCNE3 (B), V72A-KCNE3 (C), and I76A-KCNE3 (D). Expanded Y-axis scales were used for N-terminus and C-terminus plots to cover the full range of RMSF values.

WT-KCNE3

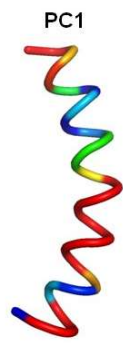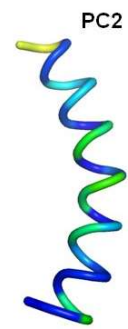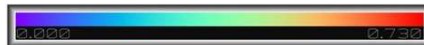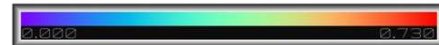

F68A-KCNE3

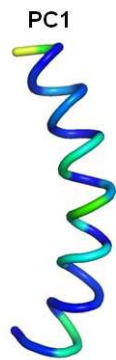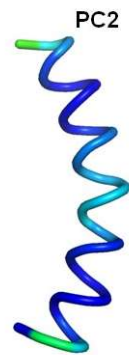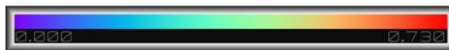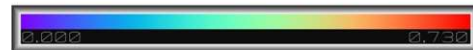

V72A-KCNE3

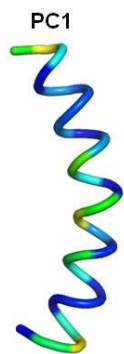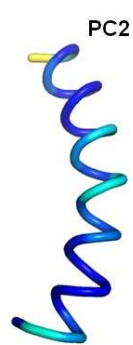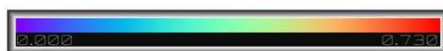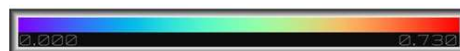

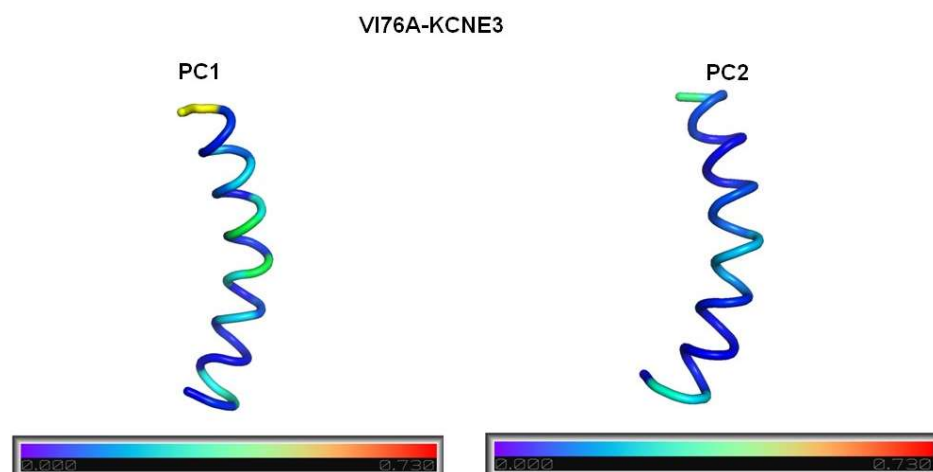

**Figure S5.** Fluctuations (b-factors) computed from PCA analysis for first principal component (PC1) (left panel) and second principal component (PC2) (right panel) for each residue mapped on KCNE3 TMD structure are shown for wild type KCNE3, F68A KCNE3, V72A KCNE3, and I76A KCNE3 incorporated into POPC/POPG lipid bilayers. The violet to red color (the bottom color bar) represents the lowest to highest fluctuations (b-factors). The image was prepared using PyMOL software (<https://pymol.org/2/>).



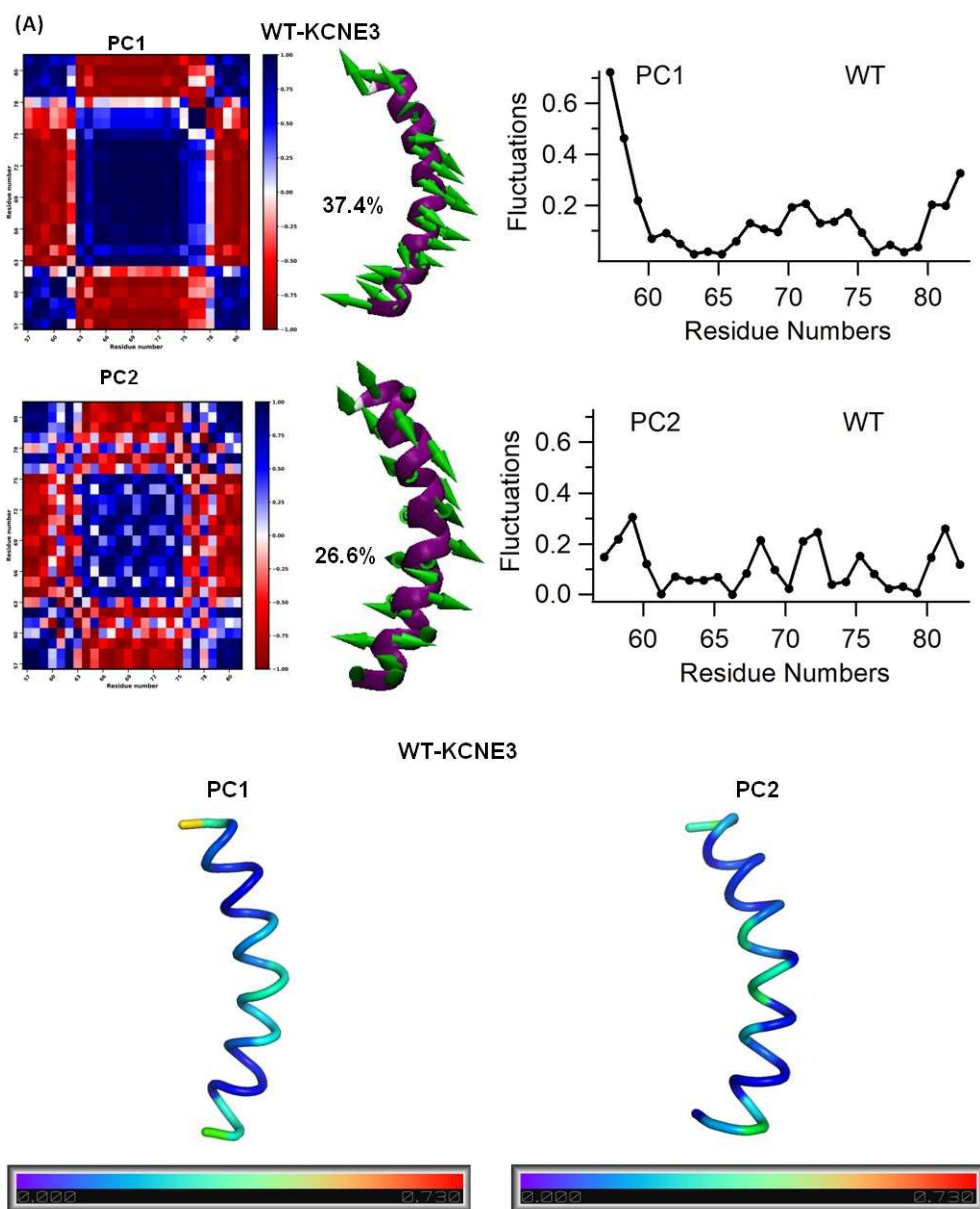



(B)

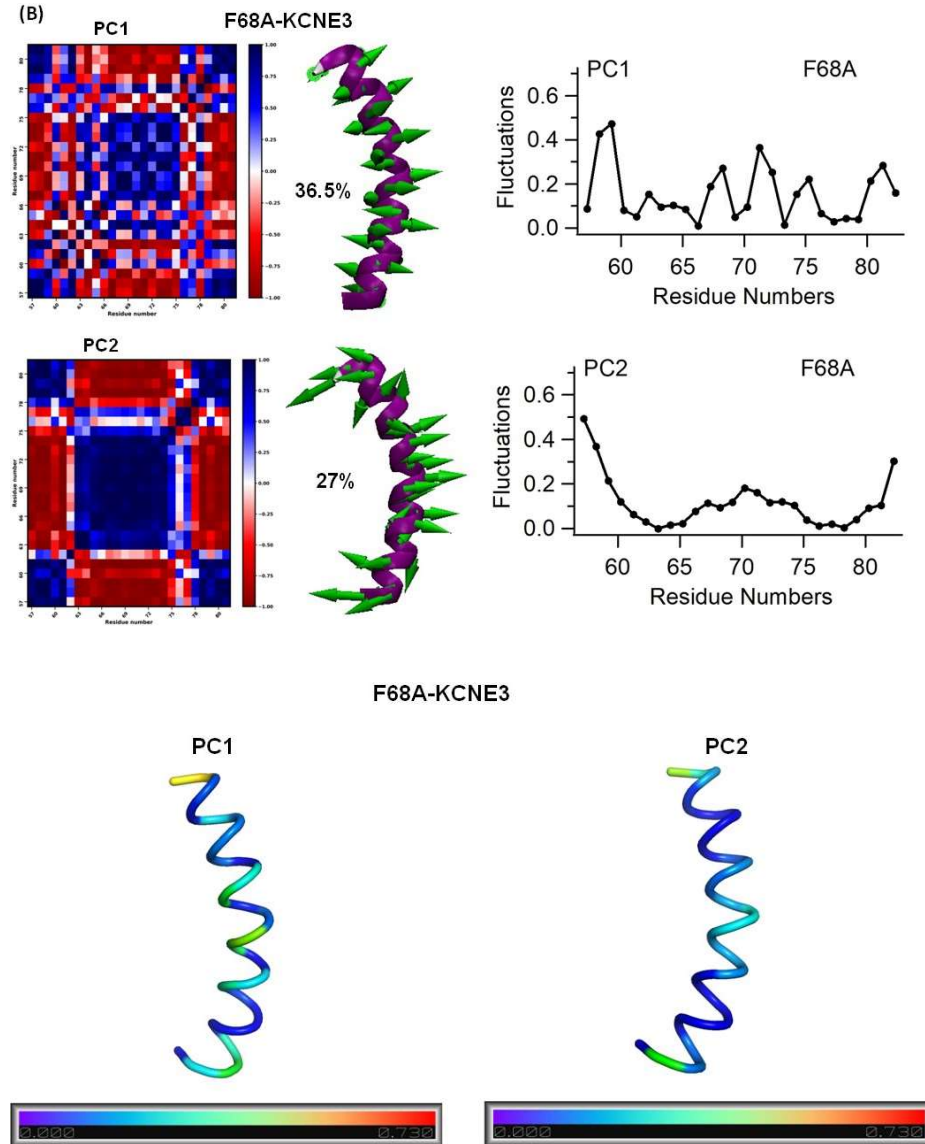

(C)

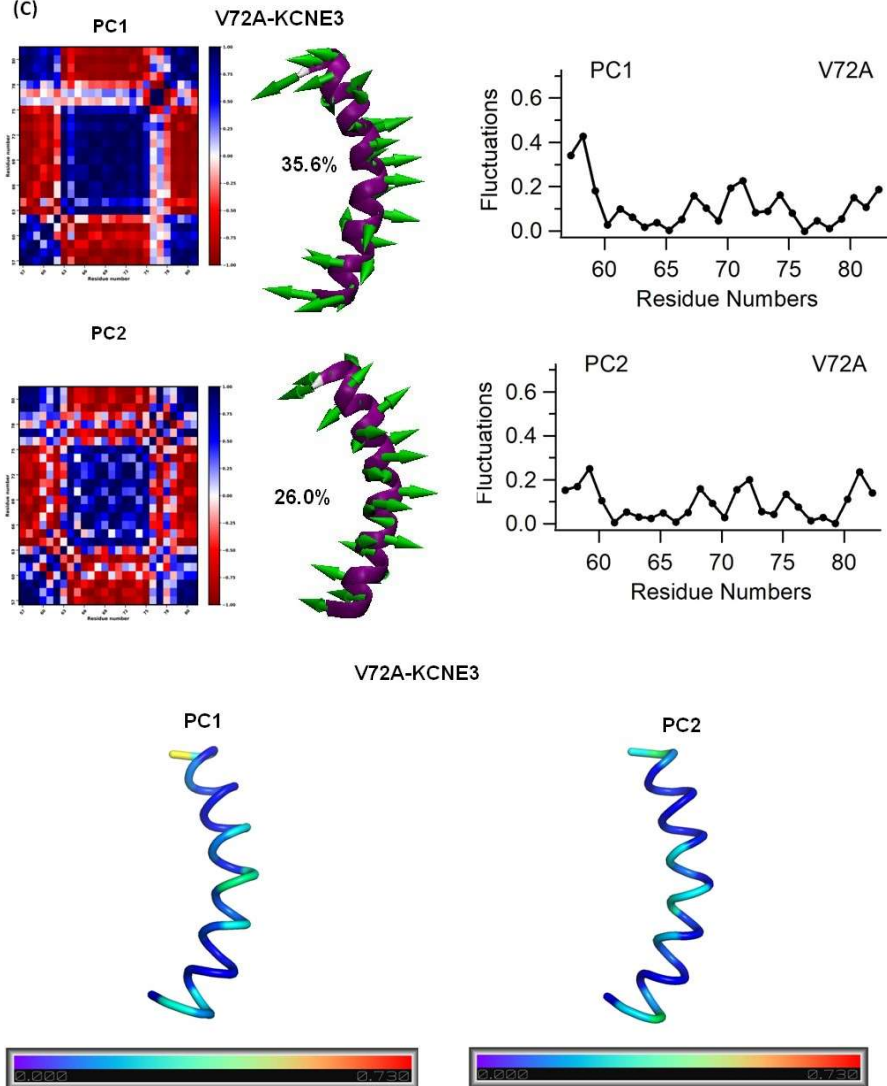

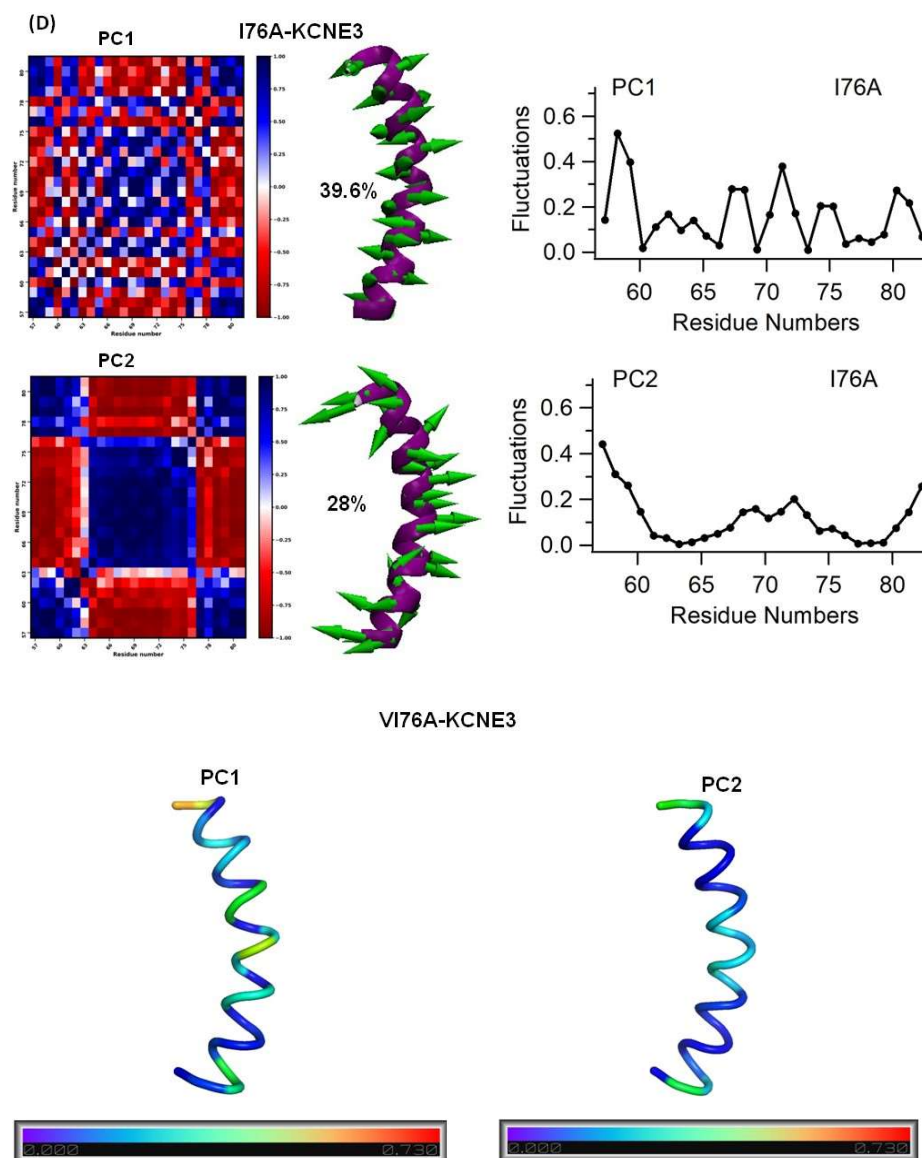

**Figure S6.** Principal Component Analysis (PCA) of KCNE3 WT and mutants for replicate simulations. The dynamic cross-correlation matrix (DCCM) computed from PCA for PC1 and PC2 is shown (left panel). The blue color represents positive correlation and the red color represents negative correlation. Vector arrows are mapped onto the protein structure and the corresponding percentage contribution of the first and second principal components are indicated (center). The green arrows represent the direction of the movement of the amino acid residue and the length represents the magnitude of the movement. The fluctuations (b-factors) of each residue are indicated for each principal component (right panel). The fluctuations of each residue are also mapped on the KCNE3 TMD structure by using color code (bottom panels). The color bar represents the increasing motion violet (lowest) and red (highest). The analysis was performed for WT-KCNE3 (A), F68A-KCNE3 (B), V72A-KCNE3 (C), and I76A-KCNE3 (D).

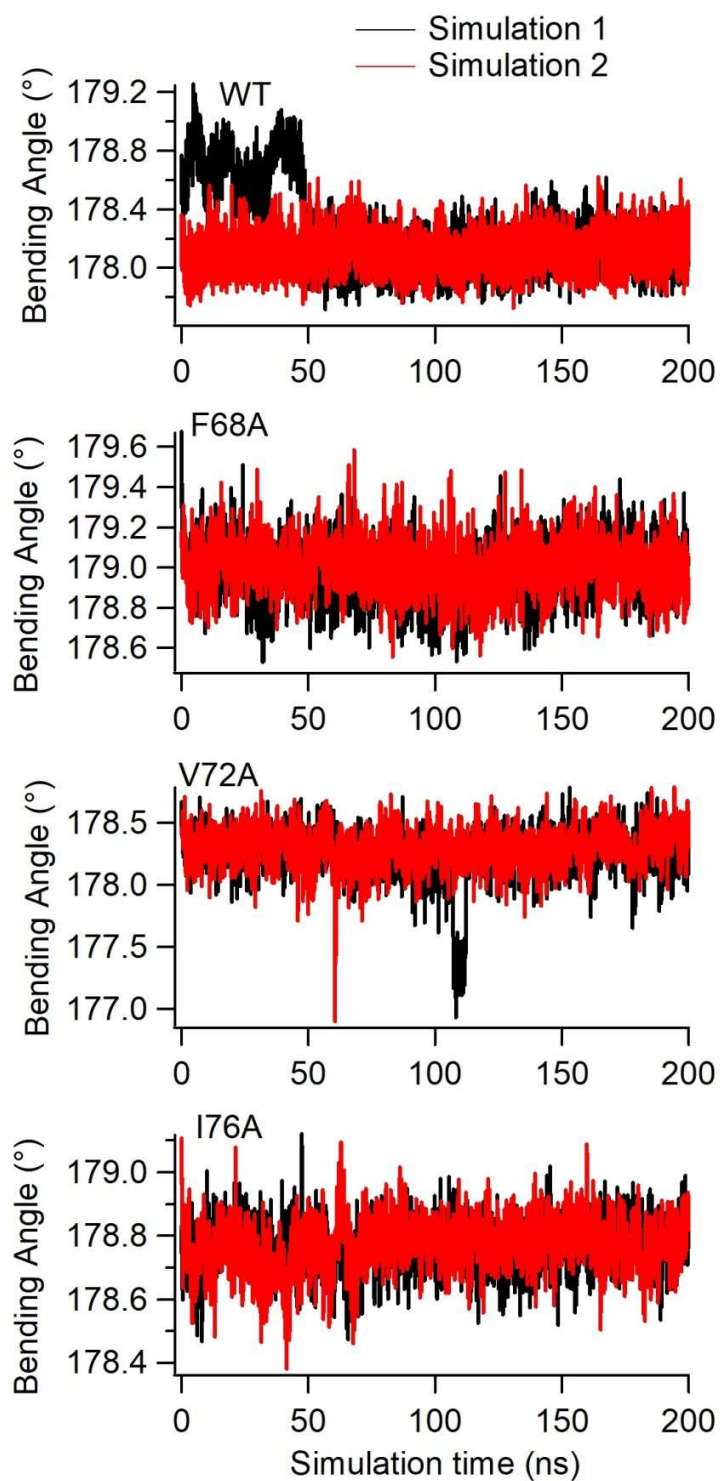

**Figure S7.** Comparison of the bending angle of KCNE3 TMD from the first simulation (Simulation 1, black) and a replicate simulation (Simulation 2, red) graphed as a function of the simulation time for WT-KCNE3, F68A-KCNE3, V72A-KCNE3, and I76A-KCNE3.

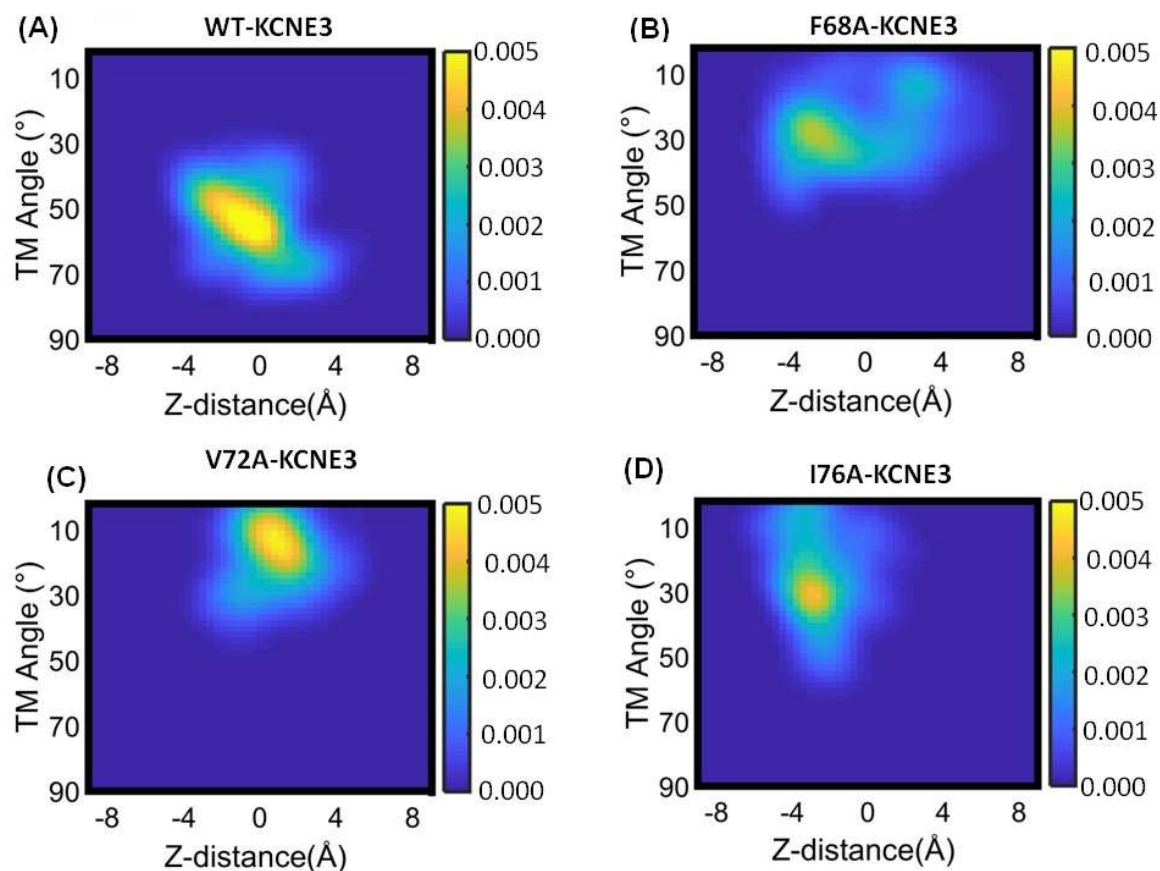

**Figure S8.** Probability density plot from Simulation 2 of transmembrane (TM) helical tilt angle against the Z-distance of TMD from the center of mass of lipid bilayer membrane for wild type KCNE3 (A), F68A KCNE3 (B), V72A KCNE3 (C), and I76A KCNE3 (D) in POPC/POPG lipid bilayers. The yellow color indicates the highest probability and blue color represents the lowest probability.

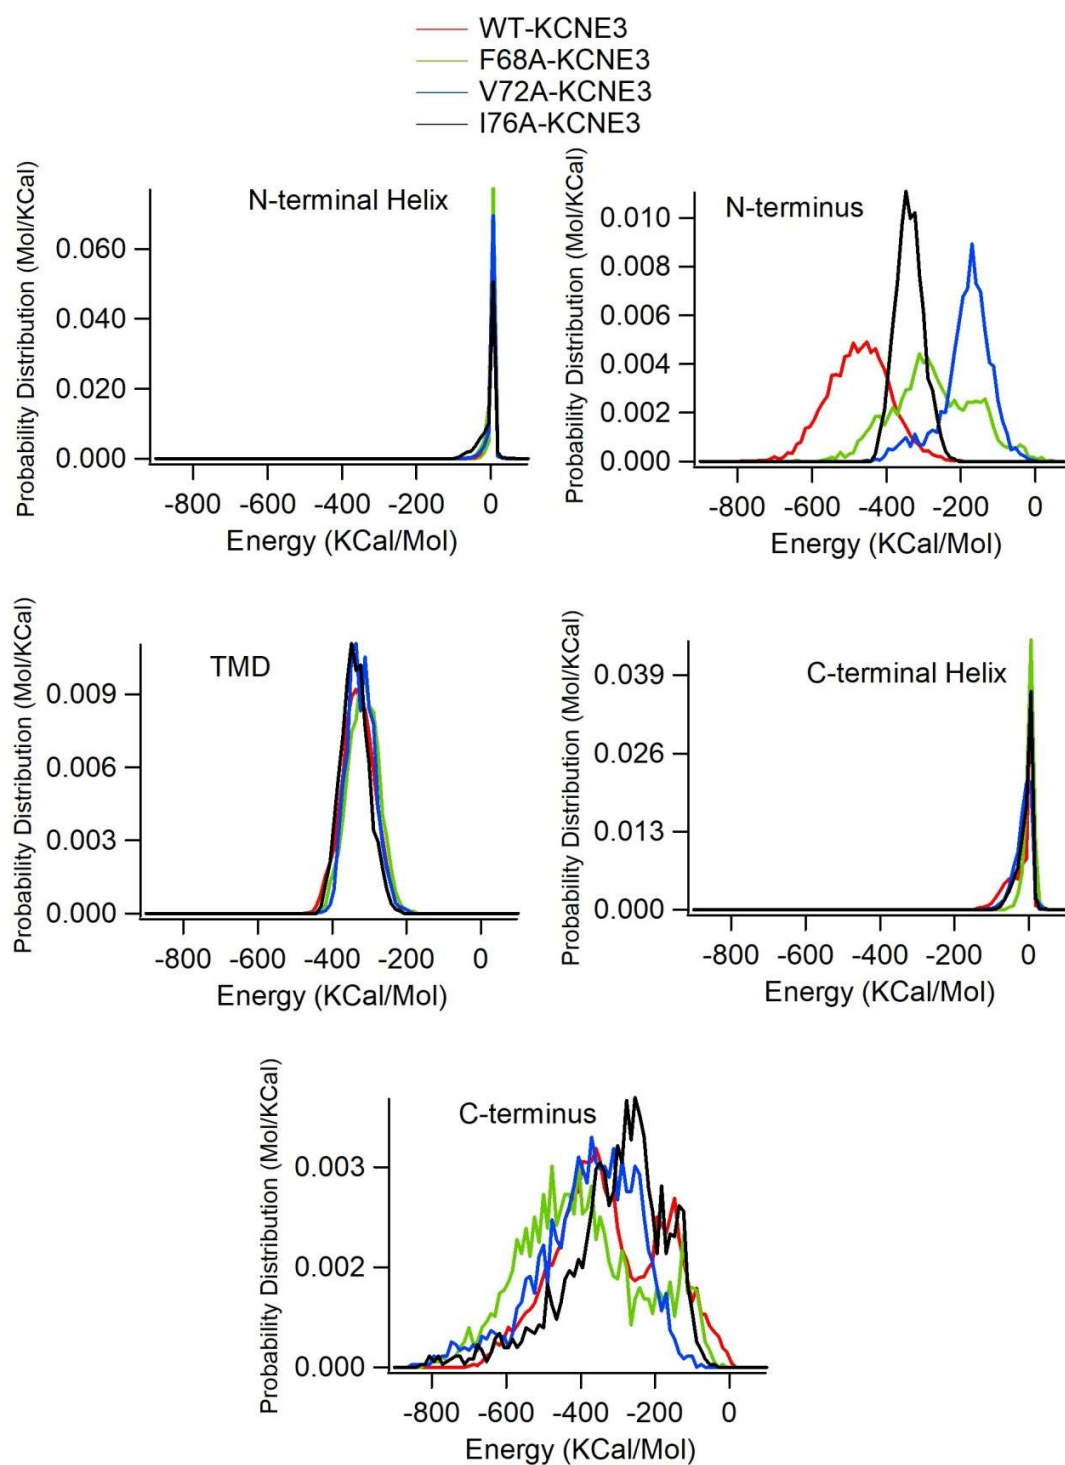

**Figure S9.** Histogram plots from Simulation 2 of interaction energy of KCNE3 segments with lipid bilayer membranes for WT KCNE3, F68A KCNE3, V72A KCNE3 and I76A KCNE3. The histogram plot represents probability distribution. The bin width of 9.4 was used to obtain histogram.

| POPC/POPG               | Average RMSD (Å) for Simulation 1 |          |          |          |
|-------------------------|-----------------------------------|----------|----------|----------|
|                         | WT                                | F68A     | V72A     | I76A     |
| <b>TMD</b>              | 2.0 ±0.6                          | 0.7±0.2  | 1.0±0.3  | 0.3±0.1  |
| <b>N-terminal helix</b> | 0.8±0.5                           | 0.9±0.3  | 0.7±0.2  | 2.4±0.4  |
| <b>N-terminus</b>       | 9.4±2.0                           | 11.8±3.6 | 10.9±2.1 | 16.7±6.0 |
| <b>C-terminal helix</b> | 2.2±0.7                           | 1.4±0.5  | 2.2±0.8  | 1.8±0.8  |
| <b>C-terminus</b>       | 3.1±0.5                           | 4.5±1.8  | 13.7±4.0 | 6.8±1.2  |

| POPC/POPG               | Average RMSD (Å) for Simulation 2 |          |          |          |
|-------------------------|-----------------------------------|----------|----------|----------|
|                         | WT                                | F68A     | V72A     | I76A     |
| <b>TMD</b>              | 0.7±0.2                           | 0.9±0.2  | 0.6±0.1  | 0.7±0.2  |
| <b>N-terminal helix</b> | 0.9±0.3                           | 1.0±0.4  | 0.8±0.2  | 0.9±0.2  |
| <b>N-terminus</b>       | 10.9±4.1                          | 10.2±2.3 | 10.9±2.1 | 15.0±5.5 |
| <b>C-terminal helix</b> | 1.8±0.5                           | 1.3±0.6  | 2.4±0.8  | 1.5±0.9  |
| <b>C-terminus</b>       | 5.2±1.2                           | 5.6±1.0  | 9.6±3.4  | 5.6±3.5  |

**Table S1.** Comparison of Average RMSD calculated for different sections of wild type KCNE3 and the KCNE3 in the presence of mutations (F68A, V72A, I76A) from the RMSDs shown in Figure S1 and S2 for Simulation 1 and Simulation 2. The error represents standard deviation.



| POPC/POPG                 | Bending Angle (°) |         |           |           |
|---------------------------|-------------------|---------|-----------|-----------|
|                           | WT                | F68A    | V72A      | I76A      |
| TMD helix<br>Simulation 1 | 178.3 ±0.3        | 179±0.2 | 178.3±0.2 | 178.8±0.1 |
| TMD helix<br>Simulation 2 | 178.1 ±0.1        | 179±0.1 | 178.3±0.2 | 178.8±0.1 |

**Table S2.** Comparison of the average bending angles calculated from the bending angles shown in Figure S2. The error represents standard deviation.

|                  | Average Z-distance (Å) Simulation 1 |           |           |           |
|------------------|-------------------------------------|-----------|-----------|-----------|
|                  | WT                                  | F68A      | V72A      | I76A      |
| N-terminal helix | 34.5 ±3.2                           | 46.4±3.8  | 43.4±2.6  | 41.9±3.3  |
| S57              | 15.1±3.1                            | 20.0±2.8  | 22.8±2.5  | 21.2±2.5  |
| A69              | -0.7±2.0                            | 4.4±2.6   | 5.2±2.2   | 6.5±3.3   |
| S82              | -16.6±3.5                           | -12.7±2.5 | -11.8±3.0 | -10.7±3.6 |
| C-terminal helix | -30.6±3.4                           | -31.3±6.2 | -28.1±3.2 | -23.9±4.7 |

| POPC/POPG               | Average Z-distance (Å) Simulation 2 |           |           |            |
|-------------------------|-------------------------------------|-----------|-----------|------------|
|                         | WT                                  | F68A      | V72A      | I76A       |
| <b>N-terminal Helix</b> | 34.2 ±3.1                           | 41.9±2.8  | 39.2±4.7  | 45.8±5.3   |
| <b>S57</b>              | 18.7±2.5                            | 18.5±2.9  | 21.8±3.0  | 20.6±3.7   |
| <b>A69</b>              | 1.3±2.0                             | 3.4±2.1   | 6.0±2.8   | 5.1±3.1    |
| <b>S82</b>              | -16.9±2.1                           | -9.4±3.4  | -11.3±3.3 | -10..7±5.8 |
| <b>C-terminal helix</b> | -28.9±7.7                           | -27.9±3.5 | -27.5±2.5 | -27.4±4.5  |

**Table S3.** Comparison of Average Z-distance calculated from the Z-distance from Simulation 1 and Simulation 2. The error is reported as the standard deviation.

|                         | Average Interaction Energy (kcal/mol) |              |              |              |
|-------------------------|---------------------------------------|--------------|--------------|--------------|
|                         | Simulation 1                          |              |              |              |
|                         | WT                                    | F68A         | V72A         | I76A         |
| <b>TMD</b>              | -309.9 ±37.3                          | -323.6±39.8  | -352.6±36.7  | -321.8±41.1  |
| <b>N-terminal helix</b> | -9.2±26.6                             | -1.2±5.1     | -1.1±4.2     | -1.7±7.2     |
| <b>N-terminus</b>       | -500.9±100.2                          | -371.1±90.0  | -300.9±132.2 | -355.9±103.1 |
| <b>C-terminal helix</b> | -13.3±16.4                            | -1.8±12.5    | -5.9±23.7    | -2.2±13.3    |
| <b>C-terminus</b>       | -225.8±97.6                           | -266.1±151.5 | -403.9±159.2 | -275±146.8   |

|                         | Average Interaction Energy (kcal/mol) |              |             |              |
|-------------------------|---------------------------------------|--------------|-------------|--------------|
|                         | Simulation 2                          |              |             |              |
|                         | WT                                    | F68A         | V72A        | I76A         |
| <b>TMD</b>              | -336.3 ±42.4                          | -322.5±40.4  | -327.9±36.2 | -344.0±36.7  |
| <b>N-terminal helix</b> | -4.3±8.7                              | -5.5±11.8    | -3.7±10.2   | -11.9±20.4   |
| <b>N-terminus</b>       | -480.2±82.4                           | -279.5±109.7 | -191.2±67.9 | -344.0±36.7  |
| <b>C-terminal helix</b> | -24.0±31.8                            | -3.9±12.1    | -20.5±21.8  | -15.1±19.5   |
| <b>C-terminus</b>       | -325.8±142.9                          | -401.2±161.4 | 385.5±133.4 | -313.9±135.3 |

**Table S4.** Comparison of Average interaction energy calculated from the interaction energy from Simulation 1 and Simulation 2. The error represents standard deviation.

MA1. WT\_PCA1

MA2. WT\_PCA2

MB1. F68A\_PCA1

MB2. F68A\_PCA2

MC1. V72A\_PCA1

MC2. V72A\_PCA2

MD1. I76A\_PCA1

MD2. I76A\_PCA2

**Movie M1.** Movie of the fluctuations mapped onto the residues of KCNE3 TMD structure for the PC1 and PC2 for WT KCNE3 (**MA1, MA2**), F68A KCNE3 (**MB1, MB2**), V72A KCNE3 (**MC1, MC2**), and I76A KCNE3 (**MD1, MD2**). These movies are prepared from the Simulation 1 PCA data.
