# Supplementary material for: Studying Conformational Properties of Transmembrane Domain of KCNE3 in a Lipid Bilayer Membrane Using Molecular Dynamics Simulations
Source: Membranes (Basel). 2024 Feb 4;14(2):45. doi: 10.3390/membranes14020045 (PMC10890134; doi:10.3390/membranes14020045)
Supplement: Supplementary file 1 [file membranes-14-00045-s001.zip]

Archive with 9 entries (9 files):
- I76A-PCA1.mpg
- I76A-PCA2.mpg
- K68A-PCA1.mpg
- K68A-PCA2.mpg
- KCNE3 Manuscript_Supporting Information 12282023.pdf
- V72A-PCA1.mpg
- V72A-PCA2.mpg
- WT-PCA1.mpg
- WT-PCA2.mpg
